# Supplementary material for: Comorbidity and survival among women with ovarian cancer: evidence from prospective studies
Source: PubMed Central journal article supplement (PMC4484350; doi:10.1038/srep11720), 2015-06-29
Supplement: srep11720-s1.pdf [file srep11720-s1.pdf]

**Comorbidity and survival among women with ovarian cancer:  
evidence from prospective studies**

Yi-Sheng Jiao, Ting-Ting Gong, Yong-Lai Wang, Qi-Jun Wu

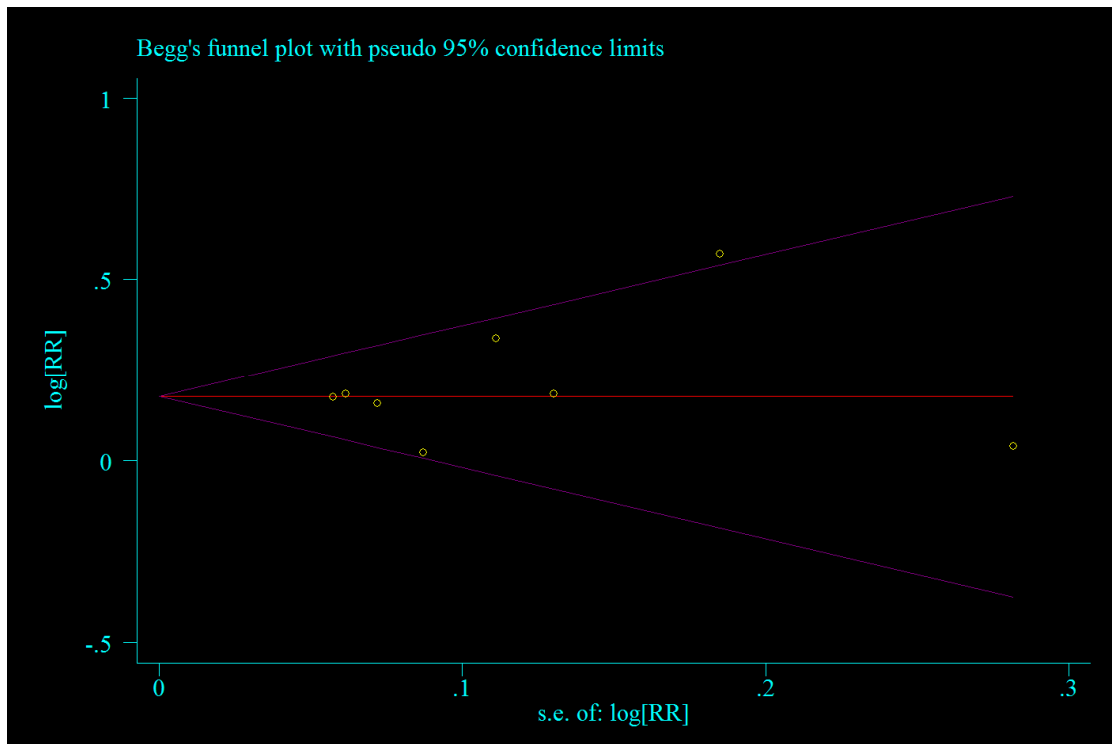

Supplementary Figure S1. Funnel plot corresponding to the random-effects meta-analysis of the relationship between comorbidity and ovarian cancer survival

Supplementary Table S1. Translation of the comorbid conditions into the Charlson Comorbidity Index.

| <b>Comorbid conditions</b>                      | <b>Charlson comorbidity index score</b> |
|-------------------------------------------------|-----------------------------------------|
| Myocardial infarction                           | 1                                       |
| Congestive heart failure                        | 1                                       |
| Peripheral vascular disease                     | 1                                       |
| Cerebrovascular disease                         | 1                                       |
| Dementia                                        | 1                                       |
| Chronic pulmonary disease                       | 1                                       |
| Connective tissue disease                       | 1                                       |
| Ulcer disease                                   | 1                                       |
| Mild liver disease                              | 1                                       |
| Diabetes type 1 or type 2                       | 1                                       |
| Hemiplegia                                      | 2                                       |
| Moderate or severe renal disease                | 2                                       |
| Diabetes with end organ damage type 1 or type 2 | 2                                       |
| Any tumour (not ovarian cancer)                 | 2                                       |
| Leukemia                                        | 2                                       |
| Lymphoma                                        | 2                                       |
| Moderate or severe liver disease                | 3                                       |
| Metastatic solid tumour                         | 6                                       |
| AIDS                                            | 6                                       |
